# Supplementary material
Source: Springer Nature journal article supplement (https://www.springermedizin.de/resource/supplementary/12943_2007_345_MOESM10_ESM.pdf/9553974)

**A**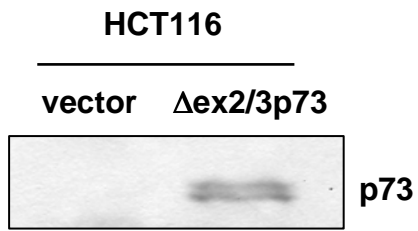**B**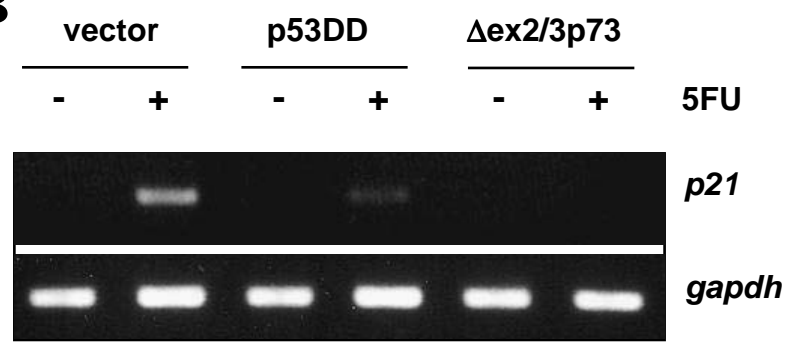**C**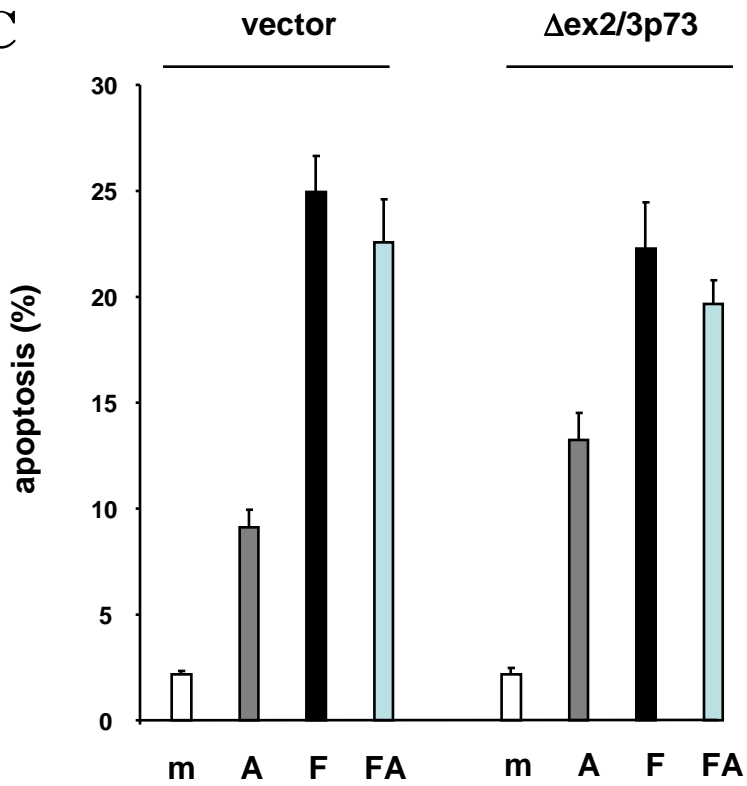

Supplement: MOESM10 [file 9553974]
